# Supplementary material for: MrTADFinder: A network modularity based approach to identify topologically associating domains in multiple resolutions
Source: PubMed Central journal article supplement (PMC5546724; doi:10.1371/journal.pcbi.1005647), 2017-07-24

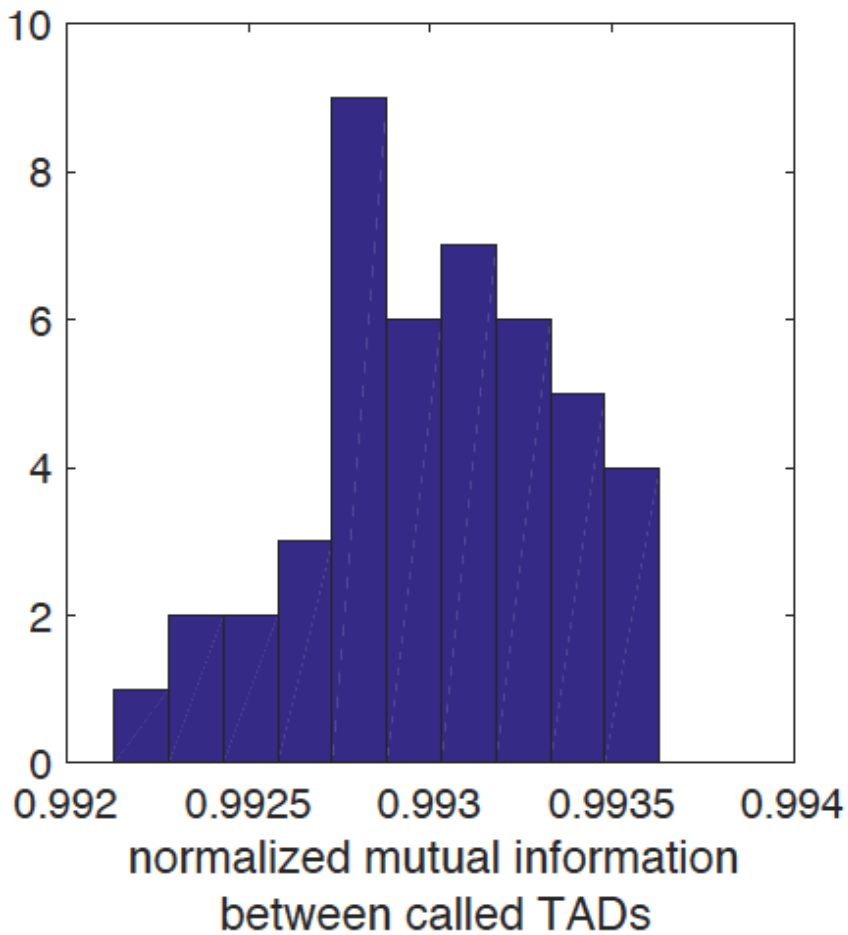

Supplement: pcbi.1005647.s008.pdf [file pcbi.1005647.s008.pdf]
